# Supplementary material for: Effect of increasing ligand length on the structure of silver complexes
Source: Royal Society of Chemistry journal article supplement (doi:10.1039/c2ce25110h), 2012-01-01
Supplement: c2ce25110h.pdf [file c2ce25110h.pdf]

# Supporting Information

## *Effect of Increasing Ligand Length on the Structure of Silver*

*Complexes Fabienne Gschwind,<sup>\*ab</sup> and Katharina M. Fromm<sup>a</sup>*

University of Fribourg, Department of Chemistry, Chemin du Musée 9, CH-1700

Fribourg, Switzerland

Katharina.Fromm@unifr.ch

Table of contents

**Fig.S1.** Packing of **2** y- direction.

**Fig. S2.** View of the packing of **3** in y-direction

**Fig. S3.** Different packings of **4** along x-, y- and z-axis.

**Fig. S4.** All four silver complexes with their packing (from top to bottom: **1**, **2**, **3** and **4**)

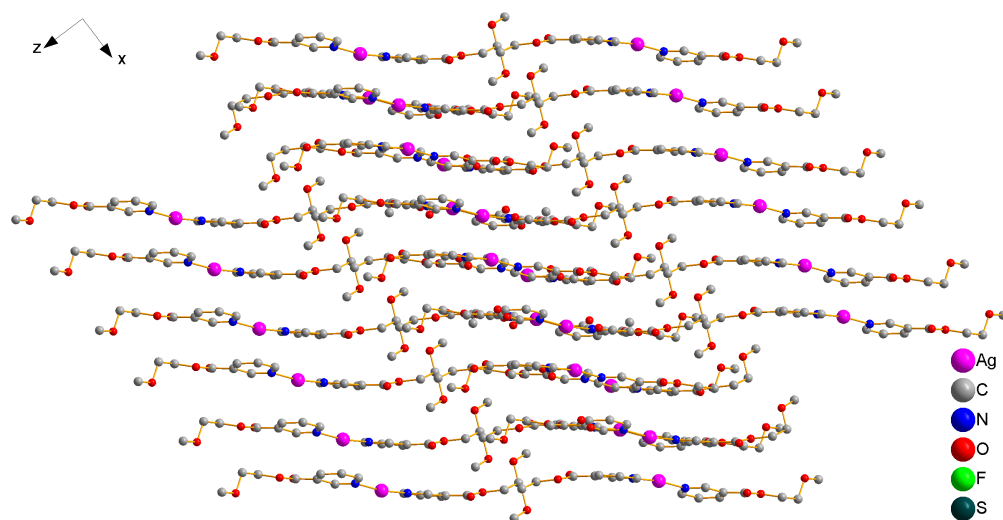

Fig. S1: Packing of **2** *y*-direction (H atoms are omitted for clarity)

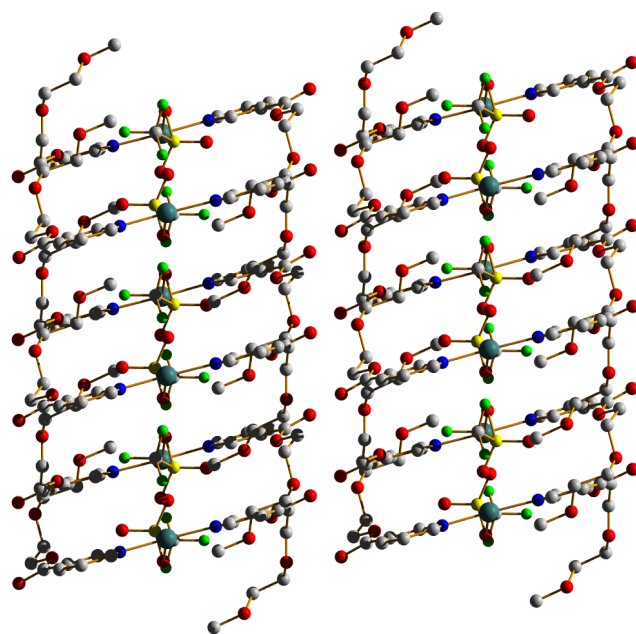

Fig. S2: View of the packing of **3** *y*-direction

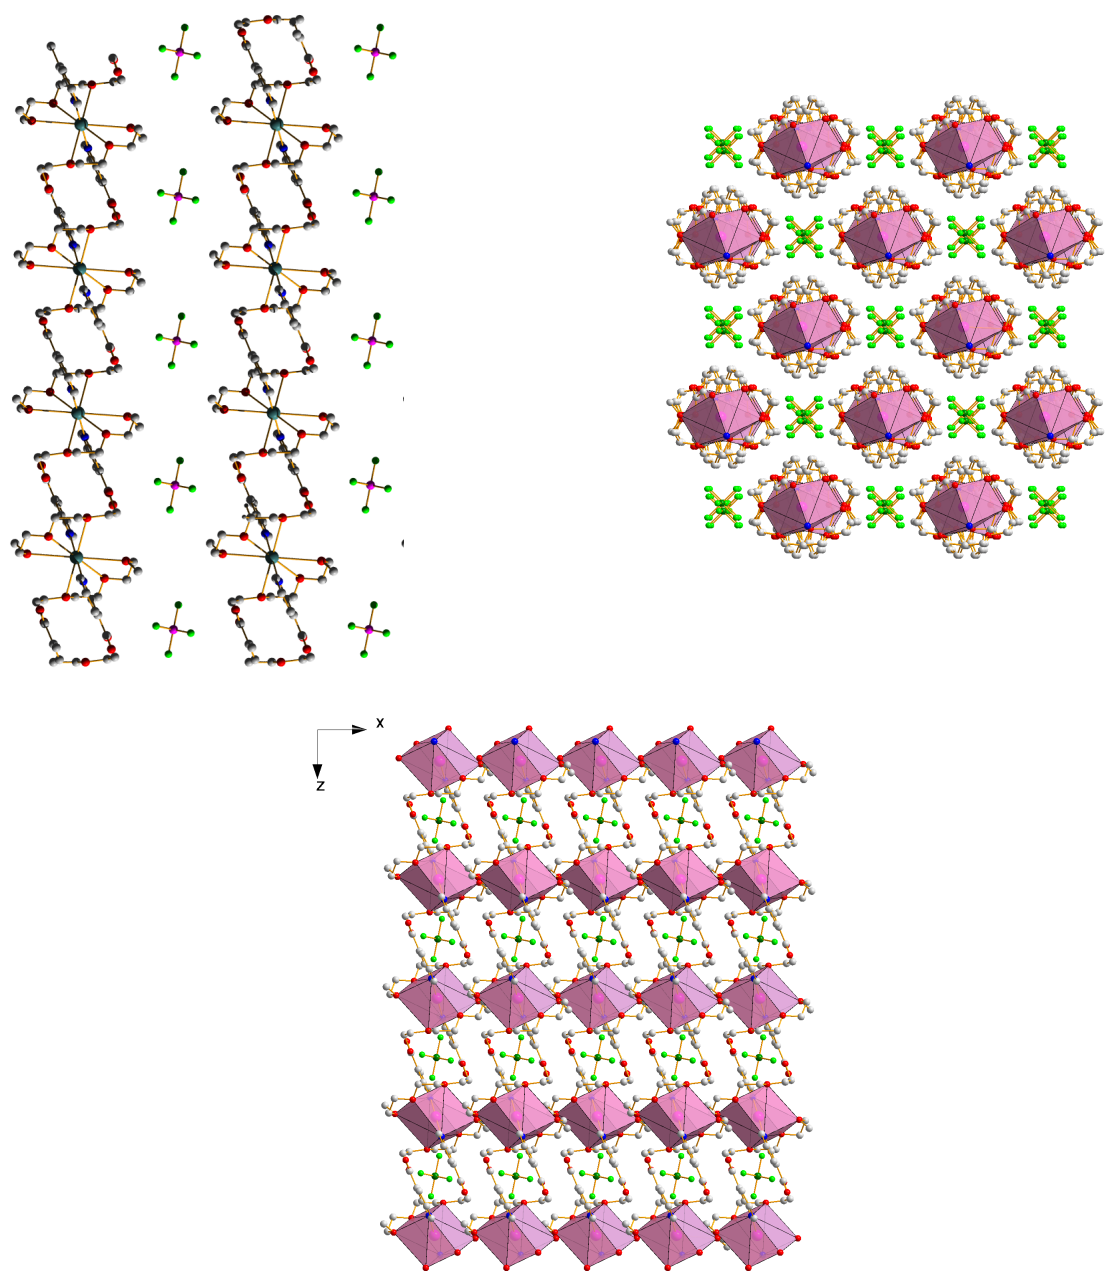

Fig. S3: Different representations of the packings of compound **4** along *x*-, *z*-axis and *y*-axis

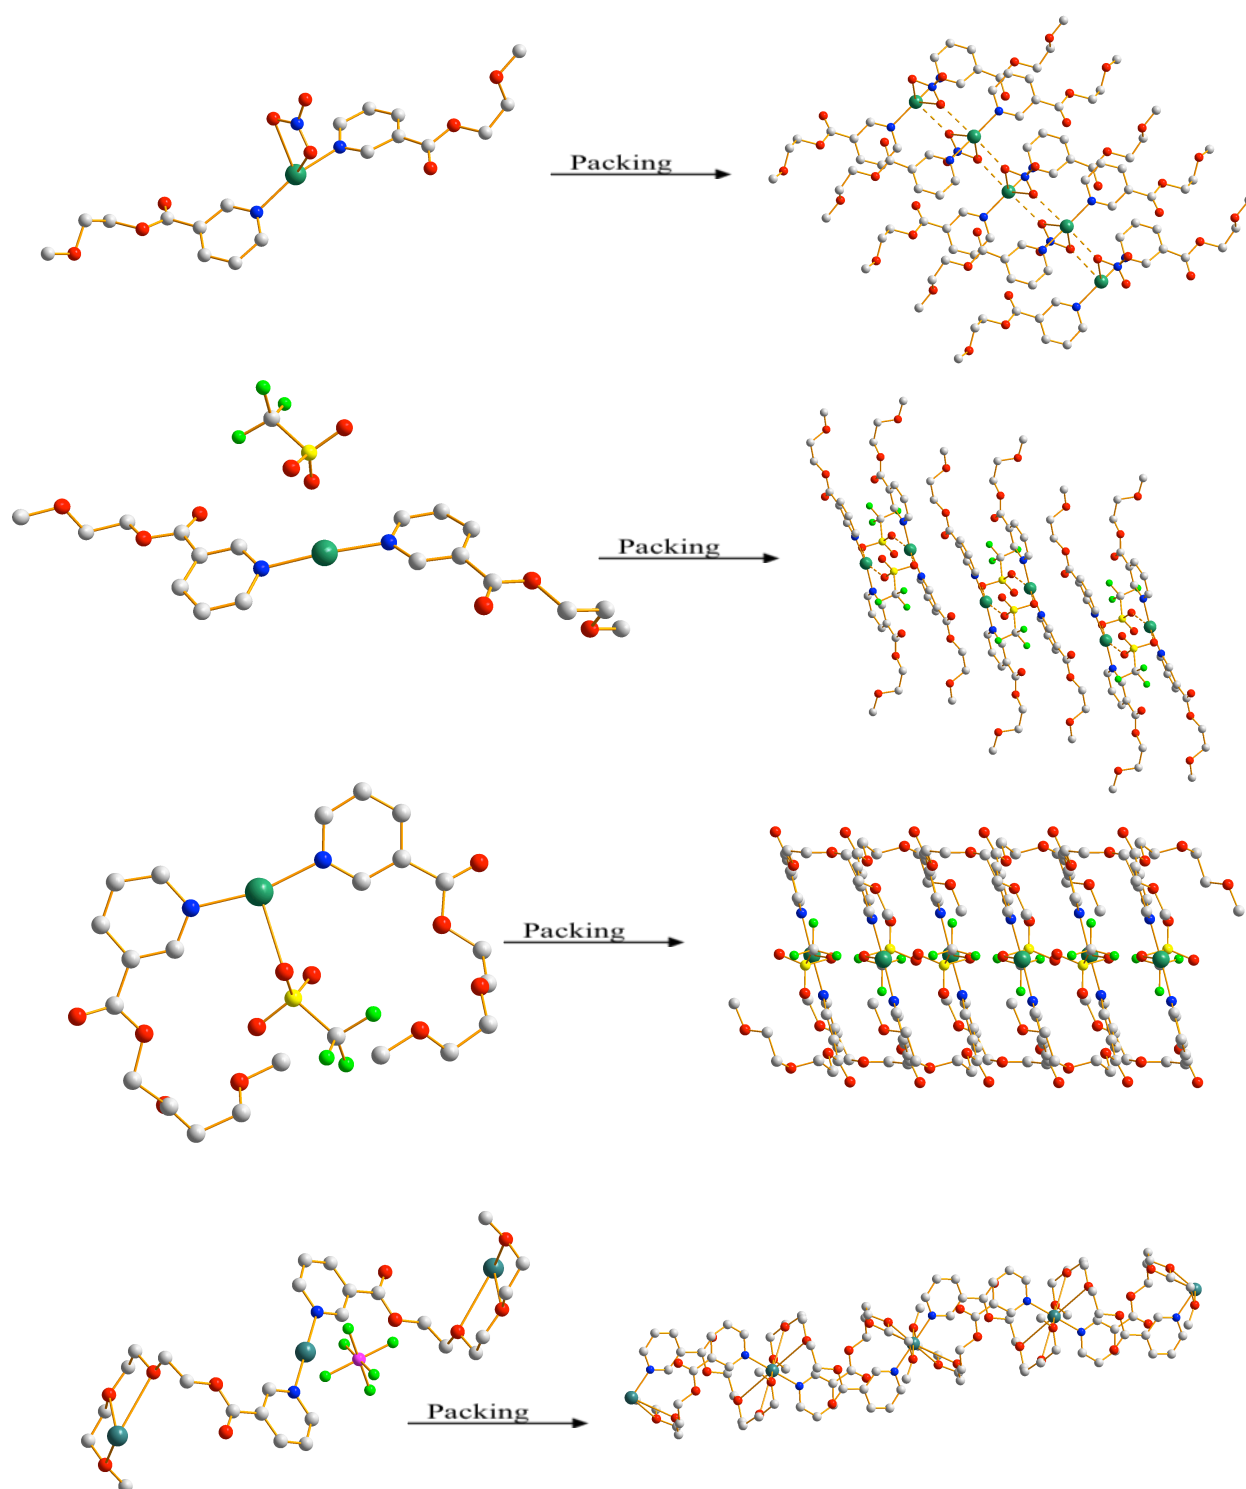

Fig. S4: All four silver complexes with their packing (from top to bottom: **1**, **2**, **3** and **4**)
